# Supplementary material for: Dominance of phage particles carrying antibiotic resistance genes in the viromes of retail food sources
Source: PubMed Central journal article supplement (PMC9860054; doi:10.1038/s41396-022-01338-0), 2022-10-26
Supplement: 41396_2022_1338_MOESM2_ESM.pdf [file 41396_2022_1338_MOESM2_ESM.pdf]

| Accession  | Description                                                                                                                       | Score      | Coverage | # Proteins | # Unique | # Peptides | % of Unique | % of Peptide | % of Unique | % of Peptide | # PSMs | # AAs | MW [kDa]    | calc. pI    | % of Unique Peptides/[kDa] (Total % of Peptides/[kDa] (Total)) |             |
|------------|-----------------------------------------------------------------------------------------------------------------------------------|------------|----------|------------|----------|------------|-------------|--------------|-------------|--------------|--------|-------|-------------|-------------|----------------------------------------------------------------|-------------|
| A0A216P6P2 | Major capsid protein OS=Salmonella phage BPS1556 OX=2060121 GN=BPS1556_11 PE=3 SV=1 - [A0A216P6P2_9CAUD]                          | 570,155441 | 58,15    | 1          | 4        | 21         | 0,85470085  | 2,27027027   | 0,02059132  | 0,054695     | 199    | 368   | 41,5078184  | 5,74462891  | 1,864508166                                                    | 1,705051225 |
| A0A251GPP5 | Putative structural protein OS=Enterobacteria phage vB_EcoM_IME338 OX=2163888 PE=4 SV=1 - [A0A251GPP5_9CAUD]                      | 461,879526 | 55,71    | 9          | 17       | 32         | 6,3247863   | 3,45945946   | 0,06294029  | 0,05994327   | 141    | 508   | 57,130863   | 6,37939453  |                                                                |             |
| A0A689W2I9 | Tail tapemeasure protein OS=Escherichia phage pinkflif OX=2696440 GN=pinkflif_21 PE=4 SV=1 - [A0A689W2I9_9CAUD]                   | 390,625679 | 45,24    | 1          | 3        | 31         | 0,85470085  | 3,35135135   | 0,01065481  | 0,04177839   | 105    | 736   | 80,2173498  | 9,67138672  |                                                                |             |
| A0A455XBP6 | phage tail tape measure OS=Escherichia phage L27 OX=2562890 PE=4 SV=1 - [A0A455XBP6_9CAUD]                                        | 380,828899 | 54,42    | 1          | 3        | 39         | 0,64102564  | 4,21621622   | 0,0079953   | 0,05258747   | 109    | 735   | 80,157295   | 9,65673828  |                                                                |             |
| A0A0H3UC50 | Major capsid protein OS=Escherichia phage HY02 OX=1527531 GN=HY02_058 PE=3 SV=1 - [A0A0H3UC50_9CAUD]                              | 375,196736 | 58,15    | 1          | 1        | 19         | 0,21367521  | 2,05405405   | 0,00513717  | 0,04938346   | 113    | 368   | 41,5999644  | 5,77001953  |                                                                |             |
| A0A689XCT5 | Major capsid protein OS=Escherichia phage warpig OX=2696461 GN=warpig_95 PE=3 SV=1 - [A0A689XCT5_9CAUD]                           | 375,196736 | 63,86    | 1          | 1        | 19         | 0,21367521  | 2,05405405   | 0,00515279  | 0,04935365   | 113    | 368   | 41,4678487  | 5,63037109  |                                                                |             |
| A0A481W3F5 | Tail length tape-measure protein OS=Escherichia phage PH811 OX=2530036 PE=4 SV=1 - [A0A481W3F5_9CAUD]                             | 362,587187 | 55,1     | 1          | 3        | 39         | 0,64102564  | 4,21621622   | 0,00798564  | 0,05252394   | 105    | 735   | 80,2727219  | 9,67138672  |                                                                |             |
| A0A455XHL7 | phage protein OS=Escherichia phage L27 OX=2562890 PE=4 SV=1 - [A0A455XHL7_9CAUD]                                                  | 322,148818 | 66,87    | 2          | 2        | 23         | 0,42735043  | 2,48648649   | 0,00805727  | 0,04688204   | 97     | 489   | 53,0391207  | 4,66552734  |                                                                |             |
| A0A689WQ1  | Baseplate assembly protein OS=Escherichia phage skuden OX=2696443 GN=skuden_43 PE=4 SV=1 - [A0A689WQ14_9CAUD]                     | 288,274184 | 66,46    | 2          | 3        | 23         | 0,64102564  | 2,48648649   | 0,01207721  | 0,04682905   | 86     | 489   | 53,097898   | 4,61474609  |                                                                |             |
| A0A3845J16 | Tail fibers protein OS=Enterobacteria phage XTG1 OX=1651201 PE=4 SV=1 - [A0A3845J16_9CAUD]                                        | 286,823802 | 29,97    | 1          | 1        | 18         | 0,21367521  | 1,94594595   | 0,00248917  | 0,02266898   | 91     | 794   | 85,8417953  | 8,77783203  |                                                                |             |
| A0A689XFQ2 | Putative tail protein OS=Escherichia phage radamba OX=2696441 GN=radamba_56 PE=4 SV=1 - [A0A689XFQ2_9CAUD]                        | 282,961296 | 44,71    | 1          | 12       | 12         | 2,56410256  | 1,29729793   | 0,08181677  | 0,04139487   | 76     | 293   | 31,3395703  | 5,02099609  |                                                                |             |
| A0A3845J98 | Tail fibers protein OS=Enterobacteria phage KhF2 OX=1651204 PE=4 SV=1 - [A0A3845J98_9CAUD]                                        | 266,785674 | 26,39    | 1          | 2        | 18         | 0,42735043  | 1,94594595   | 0,00486625  | 0,02270497   | 86     | 792   | 85,7057226  | 8,49951172  |                                                                |             |
| A0A689WPE1 | Tail fibers protein OS=Escherichia phage skuden OX=2696443 GN=skuden_39 PE=4 SV=1 - [A0A689WPE2_9CAUD]                            | 257,581438 | 24,33    | 1          | 3        | 18         | 0,64102564  | 1,94594595   | 0,00765295  | 0,02323186   | 88     | 781   | 83,7619343  | 8,58740234  |                                                                |             |
| A0A251GP51 | Tail fiber protein OS=Enterobacteria phage vB_EcoM_IME338 OX=2163888 PE=4 SV=1 - [A0A251GP51_9CAUD]                               | 240,493549 | 22,86    | 1          | 4        | 18         | 0,85470085  | 1,94594595   | 0,01003028  | 0,02283652   | 78     | 783   | 85,2120239  | 6,87353516  |                                                                |             |
| A0A384FM4  | Major capsid protein (Fragment) OS=Escherichia phage VNV OX=2488710 PE=4 SV=1 - [A0A384FM4_9VIRU]                                 | 214,377004 | 54,17    | 1          | 2        | 8          | 0,42735043  | 0,86486486   | 0,02664768  | 0,05392915   | 50     | 144   | 16,0370566  | 7,59130859  |                                                                |             |
| A0A689M307 | Tail fiber protein OS=Shigella phage Z31 OX=2675202 PE=4 SV=1 - [A0A689M307_9CAUD]                                                | 198,247812 | 25,79    | 1          | 2        | 18         | 0,42735043  | 1,94594595   | 0,00497566  | 0,02265675   | 70     | 795   | 85,8881497  | 8,86572266  |                                                                |             |
| A0A482MR91 | Tail fiber OS=Escherichia phage vB_EcoM_LMP33 OX=2491664 PE=4 SV=1 - [A0A482MR91_9CAUD]                                           | 179,12171  | 20,78    | 2          | 2        | 16         | 0,42735043  | 1,72972973   | 0,00493533  | 0,01997607   | 63     | 794   | 86,95900727 | 8,04541016  |                                                                |             |
| A0A482HJG1 | Uncharacterized protein OS=Shigella phage Silverhawkium OX=2530185 GN=Silverhawkium_gp81 PE=4 SV=1 - [A0A482HJG1_9CAUD]           | 164,812734 | 29,1     | 1          | 16       | 16         | 0,21367521  | 1,72972973   | 0,00385681  | 0,03121236   | 52     | 488   | 55,4021215  | 6,31591797  |                                                                |             |
| A0A384T024 | Tail fiber protein OS=Enterobacteria phage KhF3 OX=1651200 PE=4 SV=1 - [A0A384T024_9CAUD]                                         | 150,392019 | 41,27    | 3          | 10       | 10         | 2,13675214  | 1,08108108   | 0,05100214  | 0,02580432   | 54     | 395   | 41,8953453  | 6,96142578  |                                                                |             |
| A0A482MRM  | Uncharacterized protein OS=Escherichia phage vB_EcoM_LMP25 OX=2491663 PE=4 SV=1 - [A0A482MRM9_9CAUD]                              | 125,443554 | 59,04    | 3          | 8        | 8          | 1,70940171  | 0,86486486   | 0,09384935  | 0,0474827    | 37     | 166   | 18,2143167  | 18,14794922 |                                                                |             |
| A0A45XN56  | Uncharacterized protein OS=Salmonella phage DaR_2019a OX=2571168 GN=FFZ30_0023 PE=4 SV=1 - [A0A45XN56_9CAUD]                      | 117,398192 | 49,82    | 8          | 13       | 13         | 2,77777778  | 1,40540541   | 0,08778159  | 0,04441274   | 36     | 285   | 31,6441945  | 5,79541016  |                                                                |             |
| A0A689SPQ7 | Uncharacterized protein OS=Escherichia phage JN01 OX=2692737 PE=4 SV=1 - [A0A689SPQ7_9CAUD]                                       | 110,11253  | 72       | 1          | 6        | 9          | 1,28205128  | 0,97297297   | 0,0940883   | 0,07140539   | 39     | 125   | 13,6260432  | 9,94775391  |                                                                |             |
| A0A689LU8  | Uncharacterized protein OS=sphage NBeCO05 OX=2712974 PE=4 SV=1 - [A0A689LU8_9CAUD]                                                | 101,938223 | 48,22    | 1          | 4        | 20         | 0,85470085  | 2,16216216   | 0,014922    | 0,04425054   | 31     | 450   | 48,8618259  | 5,18603516  |                                                                |             |
| A0A0E3TRX4 | Uncharacterized protein OS=Escherichia phage vB_EcoM_AYO145A OX=1636202 GN=AYO145A_064 PE=4 SV=1 - [A0A0E3TRX4_9CAUD]             | 101,87698  | 42,22    | 1          | 3        | 19         | 0,64102564  | 2,05405405   | 0,01317769  | 0,0422256    | 30     | 450   | 48,644755   | 5,18603516  |                                                                |             |
| A0A216GV5  | Structural protein OS=Salmonella phage BPS1556 OX=2060121 GN=BPS1556_10 PE=4 SV=1 - [A0A216GV5_9CAUD]                             | 86,4972382 | 88,8     | 1          | 9        | 12         | 1,92307692  | 1,29729793   | 0,14053398  | 0,09480346   | 26     | 125   | 13,6804712  | 6,30322266  |                                                                |             |
| Q6KJ00     | Peptidase_S49 domain-containing protein OS=Salmonella phage Felix O1 (isolate Felix O1) OX=1283336 PE=3 SV=1 - [Q6KJ00_BPF01]     | 78,5900934 | 22,73    | 21         | 12       | 12         | 2,56410256  | 1,29729793   | 0,05699082  | 0,02882921   | 25     | 418   | 44,9939788  | 4,76822266  |                                                                |             |
| A0A0D4A12  | Uncharacterized protein OS=Salmonella phage vB_SpUM_SP116 OX=1567025 GN=HB2014_72 PE=4 SV=1 - [A0A0D4A12_9CAUD]                   | 74,4387329 | 41,54    | 10         | 12       | 12         | 2,56410256  | 1,29729793   | 0,06916041  | 0,03499143   | 23     | 325   | 37,0747177  | 8,89501953  |                                                                |             |
| A0A029AZK3 | Baseplate assembly protein OS=Shigella phage Sf18 OX=2024319 GN=Sf18_gp136 PE=4 SV=1 - [A0A029AZK3_9CAUD]                         | 71,9664409 | 19,5     | 2          | 6        | 6          | 0,42735043  | 0,64864865   | 0,01230859  | 0,01868244   | 22     | 318   | 34,7196954  | 6,77099609  |                                                                |             |
| A0A0D4DAW  | Uncharacterized protein OS=Salmonella phage vB_SpUM_SP116 OX=1567025 GN=HB2014_70 PE=4 SV=1 - [A0A0D4DAW4_9CAUD]                  | 63,7099726 | 33,96    | 4          | 1        | 8          | 0,21367521  | 0,86486486   | 0,00737838  | 0,02986449   | 20     | 265   | 28,9596408  | 8,22119141  |                                                                |             |
| A0A0E3XDF0 | Uncharacterized protein OS=Escherichia phage vB_EcoM_AYO145A OX=1636202 GN=AYO145A_070 PE=4 SV=1 - [A0A0E3XDF0_9CAUD]             | 55,2122338 | 43,36    | 7          | 5        | 5          | 1,06837607  | 0,54054054   | 0,08069548  | 0,04082755   | 16     | 113   | 13,239602   | 4,81787109  |                                                                |             |
| A0A386K515 | Uncharacterized protein OS=Enterobacter phage phiE3_307 OX=2340711 GN=LINGLNFE_00086 PE=4 SV=1 - [A0A386K515_9CAUD]               | 54,1603898 | 7,29     | 6          | 1        | 3          | 0,21367521  | 0,32432432   | 0,00391651  | 0,00594463   | 18     | 480   | 54,557573   | 5,82080078  |                                                                |             |
| A0A0F6R8U7 | Uncharacterized protein OS=Escherichia coli O157 typing phage 15 OX=1508677 GN=ECP15_0245 PE=4 SV=1 - [A0A0F6R8U7_9CAUD]          | 54,123055  | 38,49    | 4          | 2        | 9          | 0,42735043  | 0,97297297   | 0,01493376  | 0,03400053   | 18     | 265   | 28,6164076  | 7,23974609  |                                                                |             |
| A0A3T0IN25 | Uncharacterized protein OS=Shigella phage vB_SfIM_D04 OX=2500763 GN=vBSfIM004_089 PE=4 SV=1 - [A0A3T0IN25_9CAUD]                  | 51,245755  | 35,07    | 8          | 3        | 3          | 0,64102564  | 0,32432432   | 0,0435465   | 0,02203218   | 13     | 134   | 14,7204848  | 5,17333984  |                                                                |             |
| A0A222Z063 | Uncharacterized protein OS=Salmonella phage ST11 OX=2023990 PE=4 SV=1 - [A0A222Z063_9CAUD]                                        | 50,5963601 | 45,27    | 4          | 9        | 9          | 1,92307692  | 0,97297297   | 0,11388288  | 0,05761858   | 16     | 148   | 16,886442   | 5,74462891  |                                                                |             |
| S4TPL8     | Uncharacterized protein OS=Salmonella phage FSL SP-D12 OX=113771 GN=SP012_00160 PE=4 SV=1 - [S4TPL8_9CAUD]                        | 49,816009  | 67,86    | 1          | 11       | 11         | 2,35042735  | 1,18918919   | 0,10571867  | 0,05348793   | 17     | 196   | 22,232851   | 6,77099609  |                                                                |             |
| A0A5P8D4K9 | Uncharacterized protein OS=Pectobacterium phage Wc4-1 OX=2652429 PE=4 SV=1 - [A0A5P8D4K9_9CAUD]                                   | 48,404241  | 10,08    | 2          | 1        | 5          | 0,21367521  | 0,54054054   | 0,00389608  | 0,00956603   | 13     | 486   | 54,8436643  | 6,10009766  |                                                                |             |
| A0A0H3UDV1 | Uncharacterized protein OS=Escherichia phage HY02 OX=1527531 GN=HY02_072 PE=4 SV=1 - [A0A0H3UDV6_9CAUD]                           | 39,8764544 | 35,97    | 6          | 3        | 3          | 0,64102564  | 0,32432432   | 0,04104171  | 0,02076489   | 11     | 139   | 15,6188817  | 5,94775391  |                                                                |             |
| A0A384TF93 | Uncharacterized protein OS=Enterobacteria phage XTG1 OX=1651201 PE=4 SV=1 - [A0A384TF93_9CAUD]                                    | 33,2126919 | 42,86    | 7          | 6        | 6          | 1,28205128  | 0,64864865   | 0,08227905  | 0,01612875   | 10     | 133   | 15,5817469  | 6,18896484  |                                                                |             |
| A0A0E3TAX3 | Uncharacterized protein OS=Escherichia phage vB_EcoM_AYO145A OX=1636202 GN=AYO145A_063 PE=4 SV=1 - [A0A0E3TAX3_9CAUD]             | 29,7869463 | 54,43    | 12         | 7        | 7          | 1,4957265   | 0,75675676   | 0,08464243  | 0,04284249   | 11     | 158   | 17,6711199  | 5,04638672  |                                                                |             |
| A0A0A0RLD7 | Uncharacterized protein OS=Escherichia phage vB_EcoM_VpaE1 OX=1555238 GN=VpaE1_040 PE=4 SV=1 - [A0A0A0RLD7_9CAUD]                 | 28,8010304 | 43,09    | 3          | 5        | 5          | 1,06837607  | 0,54054054   | 0,07443868  | 0,03766195   | 9      | 123   | 14,3524314  | 8,88037109  |                                                                |             |
| A0A3845J10 | Uncharacterized protein OS=Enterobacteria phage XTG1 OX=1651201 PE=4 SV=1 - [A0A3845J10_9CAUD]                                    | 27,009408  | 51       | 3          | 4        | 4          | 0,85470085  | 0,43243243   | 0,07695452  | 0,03893483   | 7      | 100   | 11,1065711  | 4,84326172  |                                                                |             |
| O8Q234     | Uncharacterized protein OS=Salmonella phage FelixO1 OX=77775 PE=4 SV=1 - [O8Q234_9CAUD]                                           | 18,0206006 | 44,95    | 19         | 4        | 4          | 0,85470085  | 0,43243243   | 0,07096138  | 0,03590262   | 5      | 109   | 12,0445926  | 10,081543   |                                                                |             |
| A0A0A0RKH1 | Uncharacterized protein OS=Escherichia phage vB_EcoM_VpaE1 OX=1555238 GN=VpaE1_053 PE=4 SV=1 - [A0A0A0RKH1_9CAUD]                 | 14,701772  | 24,55    | 9          | 2        | 2          | 0,42735043  | 0,21621622   | 0,03660725  | 0,01852129   | 5      | 110   | 11,6739276  | 4,70361328  |                                                                |             |
| A0A689WV3  | H3JHA OS=Escherichia phage orkinos OX=2696437 GN=orkinos_11 PE=4 SV=1 - [A0A689WV30_9CAUD]                                        | 11,4321929 | 25,44    | 5          | 3        | 3          | 0,64102564  | 0,32432432   | 0,03573192  | 0,01807842   | 4      | 169   | 17,9398616  | 5,33837891  |                                                                |             |
| A0A0F6TJH5 | Gp138_N domain-containing protein OS=Escherichia coli O157 typing phage 8 OX=1508683 GN=ECP8_01530 PE=4 SV=1 - [A0A0F6TJH5_9CAUD] | 8,45222759 | 12,08    | 4          | 2        | 2          | 0,42735043  | 0,21621622   | 0,01847354  | 0,00934661   | 4      | 207   | 23,1331056  | 5,04638672  |                                                                |             |
| A0A689WRQ7 | Major capsid protein OS=Escherichia phage ityhuna OX=2696410 GN=ityhuna_34 PE=4 SV=1 - [A0A689WRQ2_9CAUD]                         | 5,95321465 | 10,25    | 15         | 2        | 2          | 0,42735043  | 0,21621622   | 0,0119398   | 0,00600849   | 2      | 322   | 35,7920919  | 5,73193359  |                                                                |             |
| A0A0A0RPQ7 | Uncharacterized protein OS=Escherichia phage vB_EcoM_VpaE1 OX=1555238 GN=VpaE1_047 PE=4 SV=1 - [A0A0A0RPQ7_9CAUD]                 | 5,64408278 | 15,16    | 52         | 3        | 3          | 0,64102564  | 0,32432432   | 0,02506758  | 0,01268284   | 3      | 244   | 25,571904   | 4,61474609  |                                                                |             |
| A0A24HYE72 | Baseplate J-like protein OS=Salmonella virus VSe102 OX=2053700 GN=vse102_068 PE=4 SV=1 - [A0A24HYE72_9CAUD]                       | 312,923231 | 66,26    | 2          | 23       | 23         | 0,42735043  | 2,48648649   | 0,00804877  | 0,04683008   | 95     | 489   | 53,0951105  | 4,61474609  |                                                                |             |
| Q8XE41     | Outer membrane porin C OS=Escherichia coli O157:H7 OX=83334 GN=ompC PE=3 SV=1 - [Q8XE41_9CAUD]                                    | 16,782     |          |            |          |            |             |              |             |              |        |       |             |             |                                                                |             |
